# Supplementary material
Source: PubMed Central journal article supplement (PMC2890718)
Supplement: 1000823107_pnas.201000823SI.pdf [file 1000823107_pnas.201000823SI.pdf]

# Supporting Information

Liénard et al. 10.1073/pnas.1000823107

## SI Materials and Methods

**Gas Chromatography-Mass Spectrometry Analyses.** Before analysis, samples were concentrated under a gentle flow of pure nitrogen to a final volume of 50  $\mu$ L. One microliter was analyzed on a gas chromatograph (Hewlett Packard HP 6890 GC system, Agilent Technologies) equipped with an HP-5MS capillary column (30 m  $\times$  250  $\mu$ m;  $d_f$  = 0.25  $\mu$ m; carrier gas: helium; velocity: 30cm/s), an automatic injector (HP-7683), and coupled to a mass selective detector (HP 5973). The GC-MS was operated in electron impact mode (70 eV) and the injector was configured in splitless mode and maintained at 280  $^{\circ}$ C. The oven temperature was held at 40  $^{\circ}$ C for

2 min and rose at a rate of 8  $^{\circ}$ C/min up to 230  $^{\circ}$ C, 10  $^{\circ}$ C/min up to 280  $^{\circ}$ C, held for 10 min. For the time-course experiment and the incubation with FAME precursor mixtures, the gas chromatograph (Hewlett Packard HP 5890II GC system) was coupled to a mass selective detector (HP 5972) and equipped with a polar INNOWax column (100% polyethylene glycol, 30 m  $\times$  0.25 mm  $\times$  0.25  $\mu$ m, Agilent Technologies). The GC-MS was operated in electron impact mode (70 eV) and the injector was configured in splitless mode at 220  $^{\circ}$ C with helium used as carrier gas (velocity: 30 cm/s). The oven temperature was maintained for 2 min at 50  $^{\circ}$ C and rose at a rate of 10  $^{\circ}$ C/min up to 220  $^{\circ}$ C, held for 20 min.

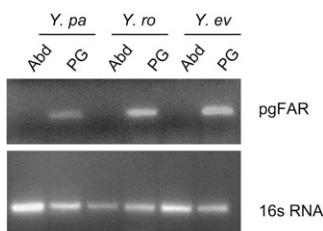

**Fig. S1.** Pheromone gland (PG) specific tissue expression of the *Yponomeuta padellus* (*Y. pa*), *Yponomeuta rorellus* (*Y. ro*), and *Yponomeuta evonymellus* (*Y. ev*) pgFAR mRNAs monitored by reverse-transcriptase PCR. RNAs were isolated from 15 female PGs and abdominal tissue (minus PG) (Abd) of each species and DNase-purified. Reactions were performed using 50 ng RNA under conditions as described in *Materials and Methods*. Amplicon sizes: pgFAR, 320 bp; 16s RNA, 397 bp.

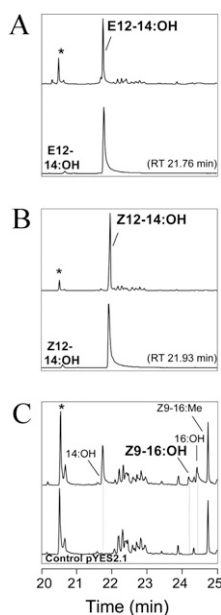

**Fig. S2.** GC-MS analyses of fatty-alcohol extracts from yeast transformed with pYES2.1-Yev-pgFAR, similarly as described in Fig. 6. In each panel, the upper chromatogram traces represent the total ion currents (TIC) from transformed yeast supplemented with 500  $\mu$ M of (A) E12-14:Me, (B) Z12-14:Me, and (C) Z9-16:Me. The lower chromatogram traces represent the TICs of (A) the E12-14 and (B) the Z12-14:alcohol references (RT = retention time,) and (C) the pYES2.1 empty vector supplemented with Z9-16:Me. Asterisks (\*) indicate the internal standard (150 ng Z11-13:OH). The y axes represent the relative abundance.

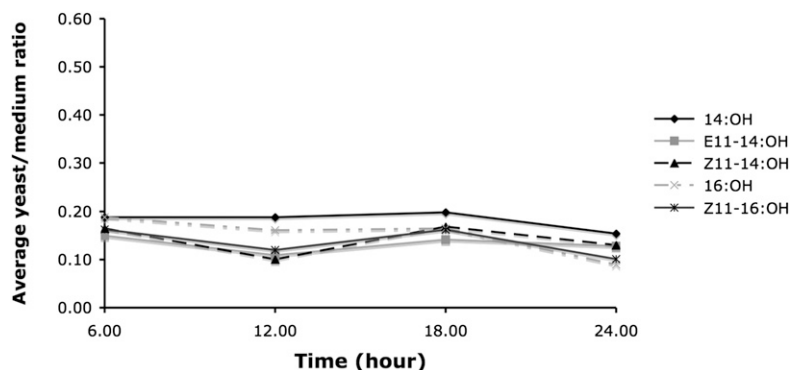

**Fig. S3.** Average yeast/medium ratio of fatty-alcohol extracts obtained at different time points over a 24-h experimental period ( $n_{\text{time\_point}} = 3$ ). The transformed yeasts expressing the pYES2.1-*Ypa*-pgFAR were supplemented with a mixture of Z11-16:Me (50  $\mu\text{M}$ ) and Z- and E11-14:Me (5  $\mu\text{M}$  each). The yeast pellet and the incubation medium were extracted separately with 1 mL *n*-hexane spiked with 150 ng of Z11-13:OH as an internal standard and analyzed by GC-MS as described in *SI Materials and Methods*. The 14:OH and 16:OH are concomitantly converted from the inherent yeast fatty-acyl pool (Fig. S2C). There is no correlation between the yeast/medium ratio and the incubation time (Spearman's rank correlation;  $P \geq 0.09$  for all alcohol products considered individually). Also, the yeast/medium ratio does not differ significantly between the different fatty alcohols (Kruskal-Wallis test; all time-points considered;  $P = 0.12$ ). In other words, the composition in fatty alcohols extracted from the yeast cells and those recovered from the incubation medium is identical, independent of incubation times, and the yeast fatty-alcohol content accurately reflects the total fatty-alcohol production.

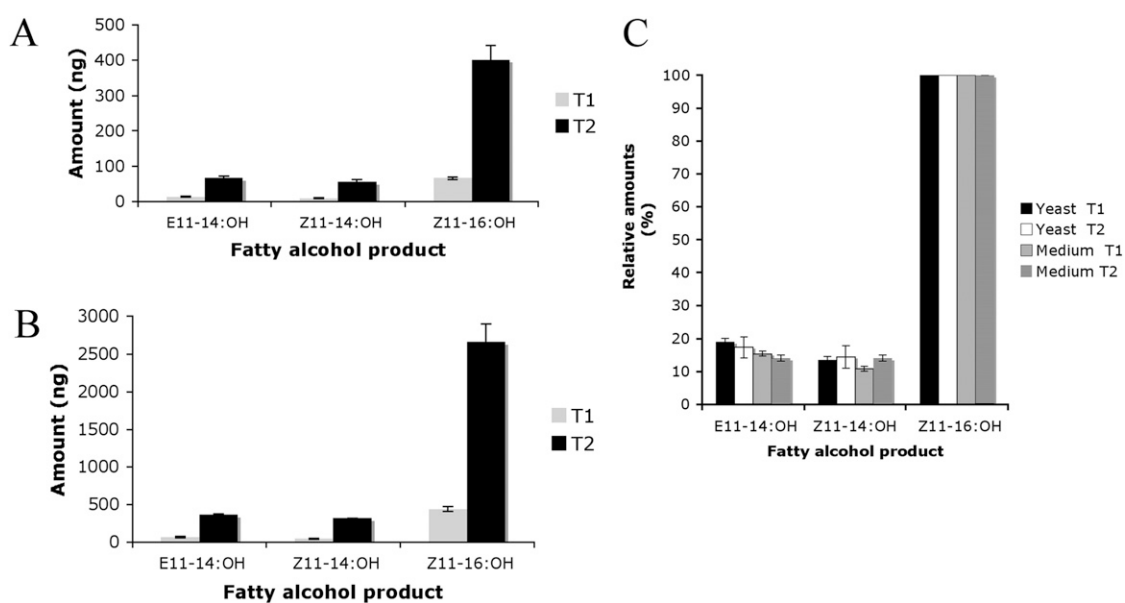

**Fig. S4.** Fatty-alcohol products extracted after a 24-h incubation period from the *InvSc1* yeast expressing the pYES2.1-*Ypa*-pgFAR supplemented with a mixture of E11-14:Me, Z11-14:Me and Z11-16:Me in a 1:1:100 ratio, which corresponds to the relative abundance of each pheromone precursor in the insect gland (1). The functional assay procedure followed the same protocol as described under *Materials and Methods*. The precursor concentrations in treatment 1 (T1) were 0.5  $\mu\text{M}$ :0.5  $\mu\text{M}$ :50  $\mu\text{M}$  and in treatment 2 (T2), 5  $\mu\text{M}$ :5  $\mu\text{M}$ :500  $\mu\text{M}$ , respectively. The yeast pellet (A) and the incubation medium (B) were extracted separately with 1 mL *n*-hexane spiked with 150 ng of Z11-13:OH as an internal standard and analyzed by GC-MS as described in *SI Materials and Methods*. Fatty alcohols are found both in the culture medium and the yeast cells with an identical composition. The total fatty-alcohol amounts are proportional to the initial fatty-acyl precursor amounts but the observed ratio between the three fatty alcohol products is constant (15:15:100) (C) and corresponds well to the 1:1:5 ratio found between the three sex pheromone components in *Y. padellus*.

- Löfstedt C, Herrebut W, Menken S (1991) Sex pheromones and their potential role in the evolution of sex reproductive isolation in small ermine moths (Yponomeutidae). *Chemoecology* 2(1):20–28.

**Table S1. *Bombyx mori* (Bmo) gene accession numbers used for NJ tree construction**

| Sequence name | Gene accession number*        |
|---------------|-------------------------------|
| Bmo-swdb1     | BGIBMGA010457                 |
| Bmo-pgFAR     | BAC79426 <sup>†</sup>         |
| Bmo-swdb2     | BGIBMGA010553 <sup>‡§</sup>   |
| Bmo-swdb3     | BGIBMGA011217_2 <sup>¶‡</sup> |
| Bmo-swdb4     | BGIBMGA011217_1 <sup>¶‡</sup> |
| Bmo-swdb5     | BGIBMGA011149 <sup>¶</sup>    |
| Bmo-swdb6     | BGIBMGA011147+48 <sup>¶</sup> |
| Bmo-swdb7     | BGIBMGA006569 <sup>¶</sup>    |
| Bmo-swdb8     | BGIBMGA000659                 |
| Bmo-swdb9     | BGIBMGA011207                 |
| Bmo-swdb10    | BGIBMGA011145 <sup>¶</sup>    |
| Bmo-swdb11    | BGIBMGA011398 <sup>¶</sup>    |
| Bmo-swdb12    | BGIBMGA011395 <sup>¶‡</sup>   |
| Bmo-swdb13    | BGIBMGA011129 <sup>¶‡§</sup>  |
| Bmo-swdb14    | BGIBMGA011138 <sup>‡</sup>    |
| Bmo-swdb15    | BGIBMGA014047                 |
| Bmo-swdb16    | BGIBMGA011126                 |
| Bmo-swdb17    | BGIBMGA011140                 |
| Bmo-swdb18    | BGIBMGA011164                 |
| Bmo-swdb19    | BGIBMGA002160                 |
| Bmo-swdb20    | BGIBMGA011116 <sup>¶</sup>    |
| Bmo-swdb21    | BGIBMGA010511 <sup>‡§</sup>   |

\*Sequences retrieved from the Silkworm Genome Database (swdb), otherwise indicated.

<sup>†</sup>Sequence retrieved from GenBank.

<sup>‡</sup>Manually corrected.

<sup>§</sup>Partial sequence.

<sup>¶</sup>Also present in EST databases.

**Table S2. Oligonucleotide primer sets**

| Primer name                                        | Primer sequence (5'–3')               | Amplicon size (bp) |
|----------------------------------------------------|---------------------------------------|--------------------|
| 5' and 3' cDNA RACE (5R or 3R) and RT-PCR (s + as) |                                       |                    |
| Yev-FARI-5R-as                                     | TGACGACATATTCGATGACCCGGTGTC           | 330*               |
| Yev-FARI-3R-s                                      | CGCTCCCTCACTTGACAGGTGACAGT            |                    |
| Yev-FARII-5R-as <sup>†</sup>                       | GCGTAAGGATGACCCCTTCGGCGCTCAA          | 320*               |
| Yev-FARII-3R-s                                     | TTAGCGGCGCCGGGGAGGGTAGACA             |                    |
| Yev-FARIII-5R-as                                   | CGTGCCCAACGTAGGCTGCTGTATC             | 333*               |
| Yev-FARIII-3R-s                                    | TGTGCGGCAAGGAGTCGCAAATGTTC            |                    |
| 16SRNA-s                                           | TGAAGGGCTGCAGTATTTTG                  | 397                |
| 16SRNA-as                                          | TCGAGGTCGCAAACCTCTTT                  |                    |
| Quantitative PCR                                   |                                       |                    |
| Yev-pgFARs                                         | TGACTTGACAATGCCTAACC                  | 179                |
| Yev-pgFARs                                         | TTCCAGACGATGACAAAGG                   |                    |
| 16SRNA-s                                           | GACCTCGATGTTGGATTAAG                  | 95                 |
| 16SRNA-as                                          | GGTTGAACTCAGATCATGTAAG                |                    |
| ORF amplification for functional assay             |                                       |                    |
| Yev-pgFAR-s <sup>‡§</sup>                          | aaa <u>ATGg</u> TTCAGTTGAAAGAAGATTCTG | 1,504              |
| Yev-pgFAR-as <sup>¶¶</sup>                         | CGACTCTCTAGGCCAGCTTTTC                |                    |
| Yev-FARI-s                                         | aaa <u>ATGg</u> CAACAGAAACAGTTGACGT   | 1,749              |
| Yev-FARI-as                                        | CCGCATAAATTCTCAAATACACTCG             |                    |
| Yev-FARIII-s                                       | aac <u>ATg</u> GTGGCAGCAGGTTGTCTG     | 1,586              |
| Yev-FARIII-as                                      | AGCAAATCCTACGCAGCAGGCAGCAA            |                    |

\*RT-PCR amplicons.

<sup>†</sup>Yev-FARII corresponds to Yev-pgFAR.

<sup>‡</sup>Primer also used to amplify Ypa-pgFAR and Yro-pgFAR ORFs.

<sup>§</sup>The start and stop codons are underlined, the Kozak sequence is indicated in lowercase letters.

<sup>¶</sup>Primer designed based on the 3'UTR sequence information.
